# Supplementary material
Source: publisher figshare collection journal article supplement (https://springernature.figshare.com/ndownloader/files/15469832)
Supplement: Supplementary file 1 [file 15469832]

**First record of *Laminaria ochroleuca* Bachelot de la Pylaie in Ireland found in Béal an Mhuirthead, County Mayo.**

Kathryn M. Schoenrock1* Tony O’Callaghan2, Rory O’Callaghan2, and Stacy A. Krueger-Hadfield3

1Botany and Plant Science, School of Natural Sciences, National University of Ireland Galway, University Rd. Galway, Ireland, H91 TK33

2SeaSearch Ireland, seasearchireland@gmail.com

3Department of Biology, University of Alabama at Birmingham, Campbell Hall 464, 1300 University Blvd., Birmingham, AL, 35294, USA

*[Kate.schoenrock@outlook.com](mailto:Kate.schoenrock@outlook.com); Tel: 353 87 637 2869 and [sakh@uab.edu](mailto:sakh@uab.edu); Tel: 205.934.6034

Running title: Expansion of *Laminaria ochroleuca* in Ireland?

Supplemental Table 1.The number of alleles, allele range, null allele frequency, and *TANDEM* ver. 1.09 output (Matschiner & Saltzburger 2009), including the specified repeat size, rounding method, average rounding error and error threshold for each microsatellite locus used to genotype *L. hyperborea* populations. The only locus with a higher rounding error than 10% of the repeat size was locus Gver_6311, shown in red and bold. All individuals flagged as errors were manually checked to make sure they were manually binned (Krueger-Hadfield *et al.* 2013).

| Locus | Dye | Allele range | Number of alleles | Null allele frequency | Specified repeat size | Rounded to | Average error | Error threshold |
| --- | --- | --- | --- | --- | --- | --- | --- | --- |
| LoIVVIV-23 (Lo_23) | VIC | 127-139 | 2 | 0 | 3 | 2/3 | 0.00 | 0.3 |
| LoIVVIV-26 (Lo_26) | PET | 201 | 1 | 0 | 4 | 1/4 | 0.10 | 0.4 |
| LoIVVIV-17 (Lo_17) | NED | 195-203 | 3 | 0 | 3 | 1/3 | 0.08 | 0.3 |
| LoIVVIV-7 (Lo_7) | 6-FAM | 226-241 | 4 | 0 | 3 | 1/3 | 0.26 | 0.3 |
| Lo5-8 (Lo_58) | VIC | 159-171 | 4 | 0.050 | 3 | 0/3 | 0.10 | 0.3 |
| LoIVVIV-13 (Lo_13) | PET | 200-209 | 4 | 0.308 | 3 | 2/3 | 0.12 | 0.3 |
| LoIVVIV-16 (Lo_16) | NED | 222-230 | 2 | 0 | 3 | 1/3 | 0.19 | 0.3 |
| LoIVVIV-27 (Lo_27) | 6-FAM | 234-242 | 4 | 0 | 4 | 2/4 | 0.12 | 0.4 |
| LoIVVIV-10 (Lo_10) | VIC | 147-154 | 3 | 0 | 3 | 1/3 | 0.08 | 0.3 |
| LoIVVIV-15 (Lo_15) | PET | 207-216 | 3 | 0 | 3 | 2/3 | 0.21 | 0.3 |
| LoIVVIV-28 (Lo_28) | NED | 225-233 | 2 | 0 | 4 | 2/4 | 0.17 | 0.4 |
| LoIVVIV-24 (Lo_24) | 6-FAM | 342-360 | 3 | 0 | 3 | 0/3 | 0.04 | 0.3 |

Supplemental Table 2.Microsatellite genotypes of 15 *Laminaria ochroleuca* sporophytes from Béal an Mhuirthead. Lo is the same as LoIVVIV.

| | Ind | Lo23 |  | Lo24 |  | Lo27 |  | Lo7 |  | Lo17 |  | Lo26 |  | Lo28 |  | Lo10 |  | Lo15 |  | Lo16 |  | Lo58 |  | Lo13 |  | | --- | --- | --- | --- | --- | --- | --- | --- | --- | --- | --- | --- | --- | --- | --- | --- | --- | --- | --- | --- | --- | --- | --- | --- | --- | | Loc_01 | 139 | 139 | 357 | 360 | 242 | 242 | 226 | 235 | 195 | 203 | 201 | 201 | 233 | 233 | 147 | 154 | 213 | 213 | 222 | 222 | 159 | 159 | 209 | 209 | | Loc_02 | 139 | 139 | 0 | 0 | 242 | 242 | 232 | 235 | 0 | 0 | 201 | 201 | 225 | 233 | 147 | 147 | 207 | 207 | 230 | 230 | 168 | 168 | 203 | 206 | | Loc_03 | 139 | 139 | 0 | 0 | 242 | 242 | 226 | 235 | 198 | 203 | 201 | 201 | 233 | 233 | 0 | 0 | 0 | 0 | 230 | 230 | 165 | 168 | 203 | 203 | | Loc_04 | 139 | 139 | 0 | 0 | 242 | 242 | 226 | 235 | 198 | 203 | 201 | 201 | 225 | 233 | 147 | 154 | 207 | 216 | 222 | 230 | 168 | 168 | 203 | 206 | | Loc_05 | 139 | 139 | 0 | 0 | 238 | 242 | 226 | 235 | 198 | 203 | 201 | 201 | 233 | 233 | 151 | 154 | 213 | 216 | 222 | 230 | 165 | 168 | 203 | 203 | | Loc_06 | 139 | 139 | 357 | 360 | 238 | 242 | 226 | 235 | 198 | 203 | 201 | 201 | 233 | 233 | 147 | 154 | 207 | 216 | 222 | 230 | 165 | 168 | 206 | 206 | | Loc_07 | 139 | 139 | 342 | 360 | 242 | 242 | 232 | 241 | 0 | 0 | 201 | 201 | 225 | 233 | 147 | 154 | 207 | 216 | 0 | 0 | 0 | 0 | 209 | 209 | | Loc_08 | 139 | 139 | 360 | 360 | 238 | 242 | 235 | 235 | 203 | 203 | 201 | 201 | 233 | 233 | 0 | 0 | 216 | 216 | 222 | 230 | 168 | 168 | 0 | 0 | | Loc_09 | 139 | 139 | 360 | 360 | 242 | 242 | 226 | 235 | 198 | 203 | 201 | 201 | 225 | 233 | 147 | 154 | 207 | 216 | 222 | 222 | 168 | 168 | 209 | 209 | | Loc_10 | 139 | 139 | 342 | 360 | 242 | 242 | 232 | 235 | 198 | 203 | 201 | 201 | 225 | 233 | 147 | 154 | 207 | 216 | 222 | 230 | 168 | 171 | 209 | 209 | | Loc_11 | 127 | 139 | 342 | 360 | 242 | 242 | 226 | 235 | 198 | 198 | 201 | 201 | 225 | 233 | 147 | 147 | 207 | 216 | 222 | 230 | 168 | 171 | 206 | 206 | | Loc_12 | 139 | 139 | 0 | 0 | 238 | 242 | 226 | 235 | 198 | 203 | 201 | 201 | 225 | 233 | 147 | 154 | 207 | 216 | 222 | 230 | 168 | 171 | 209 | 209 | | Loc_13 | 139 | 139 | 342 | 342 | 238 | 242 | 226 | 235 | 198 | 203 | 201 | 201 | 225 | 233 | 147 | 147 | 207 | 207 | 222 | 230 | 168 | 171 | 209 | 209 | | Loc_14 | 139 | 139 | 360 | 360 | 234 | 242 | 226 | 235 | 198 | 198 | 201 | 201 | 225 | 233 | 147 | 154 | 207 | 216 | 222 | 222 | 0 | 0 | 200 | 203 | | Loc_15 | 139 | 139 | 342 | 360 | 242 | 242 | 226 | 235 | 198 | 203 | 201 | 201 | 225 | 233 | 147 | 154 | 207 | 216 | 222 | 230 | 165 | 168 | 203 | 206 | |
| --- | --- | --- | --- | --- | --- | --- | --- | --- | --- | --- | --- | --- | --- | --- | --- | --- | --- | --- | --- | --- | --- | --- | --- | --- | --- | --- | --- | --- | --- | --- | --- | --- | --- | --- | --- | --- | --- | --- | --- | --- | --- | --- | --- | --- | --- | --- | --- | --- | --- | --- | --- | --- | --- | --- | --- | --- | --- | --- | --- | --- | --- | --- | --- | --- | --- | --- | --- | --- | --- | --- | --- | --- | --- | --- | --- | --- | --- | --- | --- | --- | --- | --- | --- | --- | --- | --- | --- | --- | --- | --- | --- | --- | --- | --- | --- | --- | --- | --- | --- | --- | --- | --- | --- | --- | --- | --- | --- | --- | --- | --- | --- | --- | --- | --- | --- | --- | --- | --- | --- | --- | --- | --- | --- | --- | --- | --- | --- | --- | --- | --- | --- | --- | --- | --- | --- | --- | --- | --- | --- | --- | --- | --- | --- | --- | --- | --- | --- | --- | --- | --- | --- | --- | --- | --- | --- | --- | --- | --- | --- | --- | --- | --- | --- | --- | --- | --- | --- | --- | --- | --- | --- | --- | --- | --- | --- | --- | --- | --- | --- | --- | --- | --- | --- | --- | --- | --- | --- | --- | --- | --- | --- | --- | --- | --- | --- | --- | --- | --- | --- | --- | --- | --- | --- | --- | --- | --- | --- | --- | --- | --- | --- | --- | --- | --- | --- | --- | --- | --- | --- | --- | --- | --- | --- | --- | --- | --- | --- | --- | --- | --- | --- | --- | --- | --- | --- | --- | --- | --- | --- | --- | --- | --- | --- | --- | --- | --- | --- | --- | --- | --- | --- | --- | --- | --- | --- | --- | --- | --- | --- | --- | --- | --- | --- | --- | --- | --- | --- | --- | --- | --- | --- | --- | --- | --- | --- | --- | --- | --- | --- | --- | --- | --- | --- | --- | --- | --- | --- | --- | --- | --- | --- | --- | --- | --- | --- | --- | --- | --- | --- | --- | --- | --- | --- | --- | --- | --- | --- | --- | --- | --- | --- | --- | --- | --- | --- | --- | --- | --- | --- | --- | --- | --- | --- | --- | --- | --- | --- | --- | --- | --- | --- | --- | --- | --- | --- | --- | --- | --- | --- | --- | --- | --- | --- | --- | --- | --- | --- | --- | --- | --- | --- | --- | --- | --- | --- | --- | --- | --- | --- | --- | --- | --- | --- | --- | --- | --- | --- | --- | --- | --- | --- | --- | --- | --- | --- | --- | --- | --- | --- | --- | --- | --- | --- | --- | --- | --- | --- | --- | --- | --- | --- | --- | --- | --- | --- | --- | --- | --- | --- | --- |
|  |
